# Supplementary material for: Resolution of Two Steps in Botulinum Neurotoxin Serotype A1 Light Chain Localization to the Intracellular Plasma Membrane
Source: MDPI journal article supplement (doi:10.3390/ijms222011115), 2021-10-15
Supplement: s1 [file s1]

**Authors:** Alexander Gardner et al.,

**Title:** Resolution of two steps in Botulinum Neurotoxin serotype A1 Light Chain trafficking to the intracellular plasma membrane.

**Topic:** Suppelmenal Figures 1-4

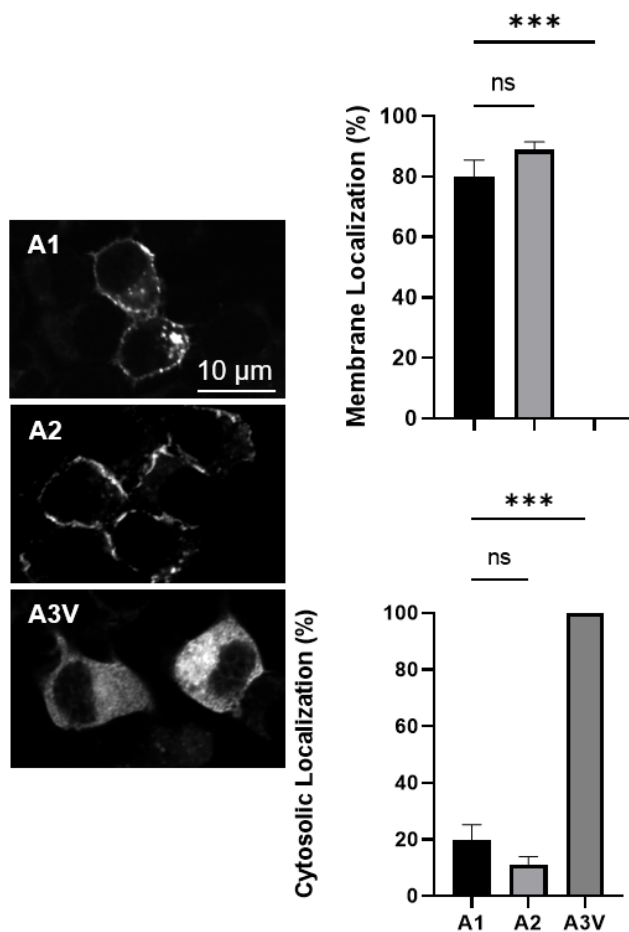

**Supplemental Figure S1. A3V is expressed as a cytosolic protein, while A1 and A2, localize on the plasma membrane of N2A cells.** N2A cells were transfected overnight with pEGFP-LC/A1 (A1), pEGFP-LC/A2 (A2), or pEGFP-LC/A3V (A3V), fixed with 4% paraformaldehyde, and imaged for EGFP fluorescence (ex<sup>488</sup>nm/em<sup>509</sup>nm). (Left) Representative images show the steady-state localization of A1, A2, and A3V. (Right) Percentage of EGFP membrane or cytosolically localized. Ten random fields were selected and counted for membrane (Upper) or cytosolic (Lower) localization. Mean and SEM was evaluated, with Ordinary one-way ANOVA with Dunnett's multiple comparisons test using A1 as the control column: NS= not significant, \*\*=P<0.05, \*\*\*=P<.001.

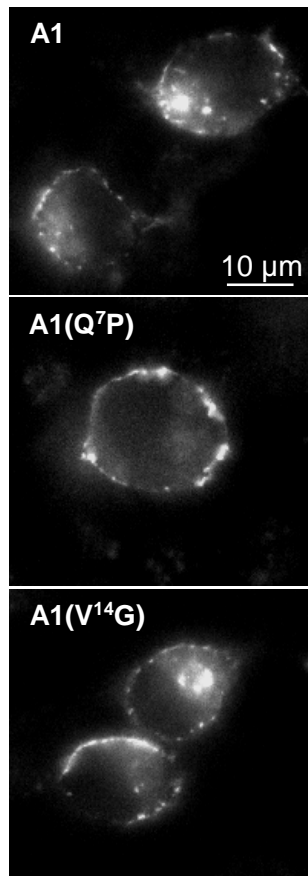

**Supplemental Figure S2. Intracellular localization of A1 N Point mutations.** After overnight transfections, N2A cells were fixed with 4% paraformaldehyde and imaged for EGFP fluorescence (excitation 488 nm/emission 509 nm). Representative images show the steady-state localization of EGFP-LC/A1 (A1), and EGFP-LC/A1(Q7P) (A1(Q7P)), and EGFP-LC/A1(V14G) (A1(V14G)).

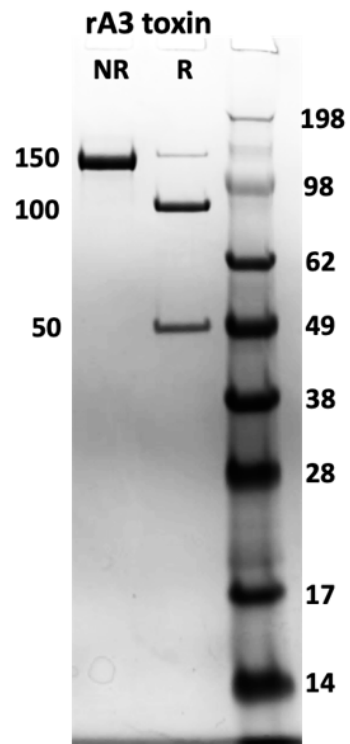

**Supplemental Figure S3. SDS-PAGE analysis of BoNT/A3V.** rBoNT/A3V (rA3V) was purified from *C. botulinum* strain Hall A *hyper* tox- and subjected to SDS-PAGE. Lanes: **(NR)**, nonreduced full length rBoNT/A3V; **(R)**, reduced rBoNT/A3V; (far right), showed migration of molecular weight marker Seeblue2.

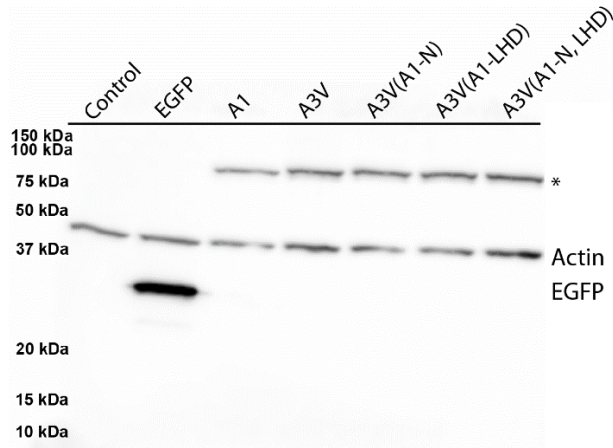

**Supplemental Figure S4. Western blotting of GFP-A3V-A1.** Cell lysates for N2A cells transfected with the DNA encoding the indicated EGFP-fusion protein (\*) was subjected to 13.5% SDS-PAGE, transferred to a PVDF membrane, and probed for GFP with rat-anti-EGFP antibody 1:5000 followed by Goat-anti-rat IgG-HRP (1:20000) with Super Signal for detection as described in the methods section. Each GFP signal was detected in lysates expressing each EGFP-fusion protein, while lysates expressing EGFP alone yielded a (EGFP) reactive band at ~26 kDa. Actin (Actin) was probed as a loading control.
